# Supplementary material
Source: PubMed Central journal article supplement (PMC4198364)
Supplement: auto-10-1801-s01.pdf [file auto-10-1801-s01.pdf]

## **Supplemental Material to:**

**Xiangnan Zhang, Yang Yuan, Lei Jiang, Jingying Zhang,  
Jieqiong Gao, Zhe Shen, Yanrong Zheng, Tian Deng,  
Haijing Yan, Wenlu Li, Wei-Wei Hou, Jianxin Lu, Yao Shen,  
Haibing Dai, Wei-Wei Hu, Zhuohua Zhang,  
and Zhong Chen**

**Endoplasmic reticulum stress induced by tunicamycin and  
thapsigargin protects against transient ischemic brain  
injury: Involvement of PARK2-dependent mitophagy**

**Autophagy 2014; 10(10)**

**<http://dx.doi.org/10.4161/auto.32136>**

**[www.landesbioscience.com/journals/autophagy/article/32136](http://www.landesbioscience.com/journals/autophagy/article/32136)**

Figure S1

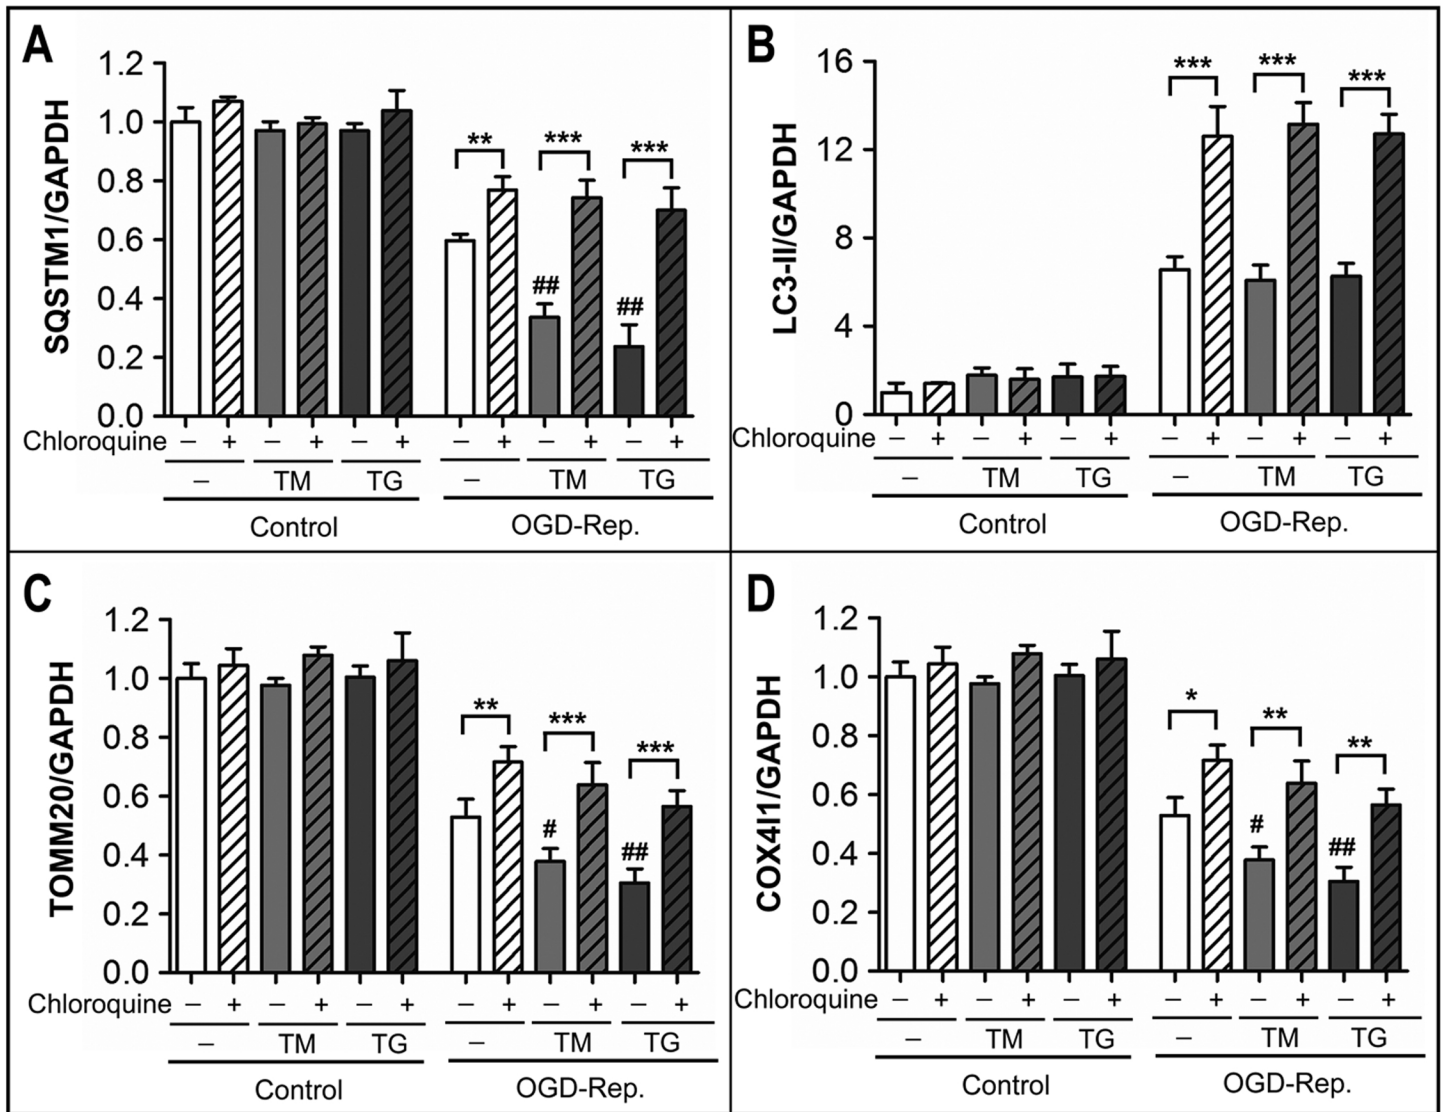

Figure S2

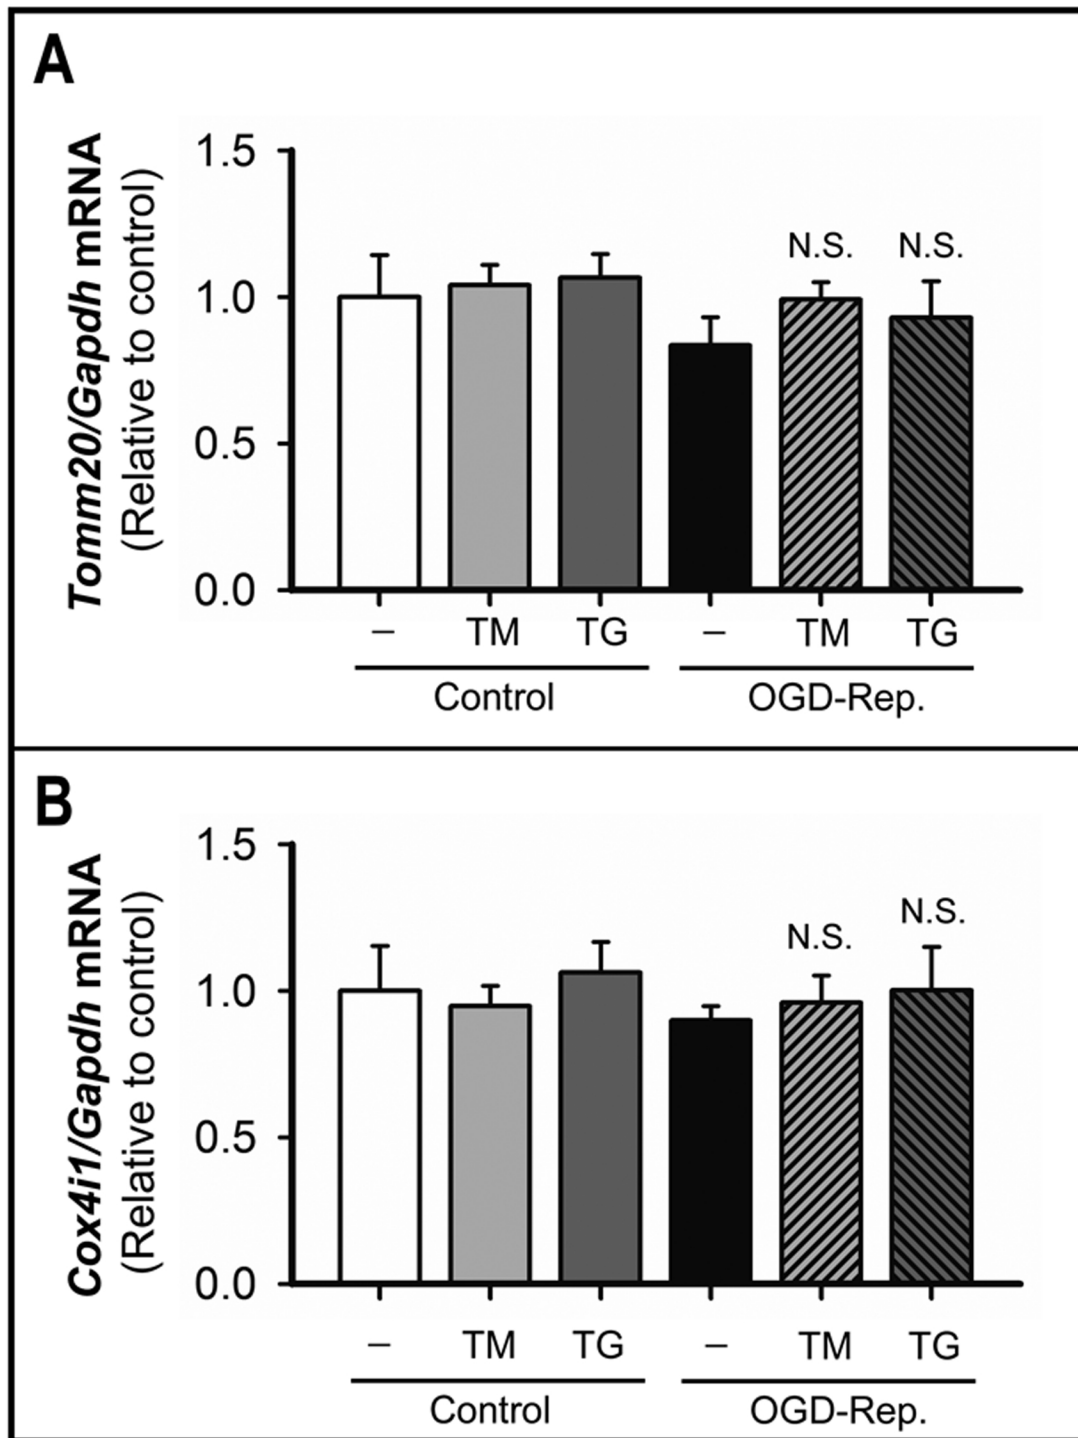

Figure S3

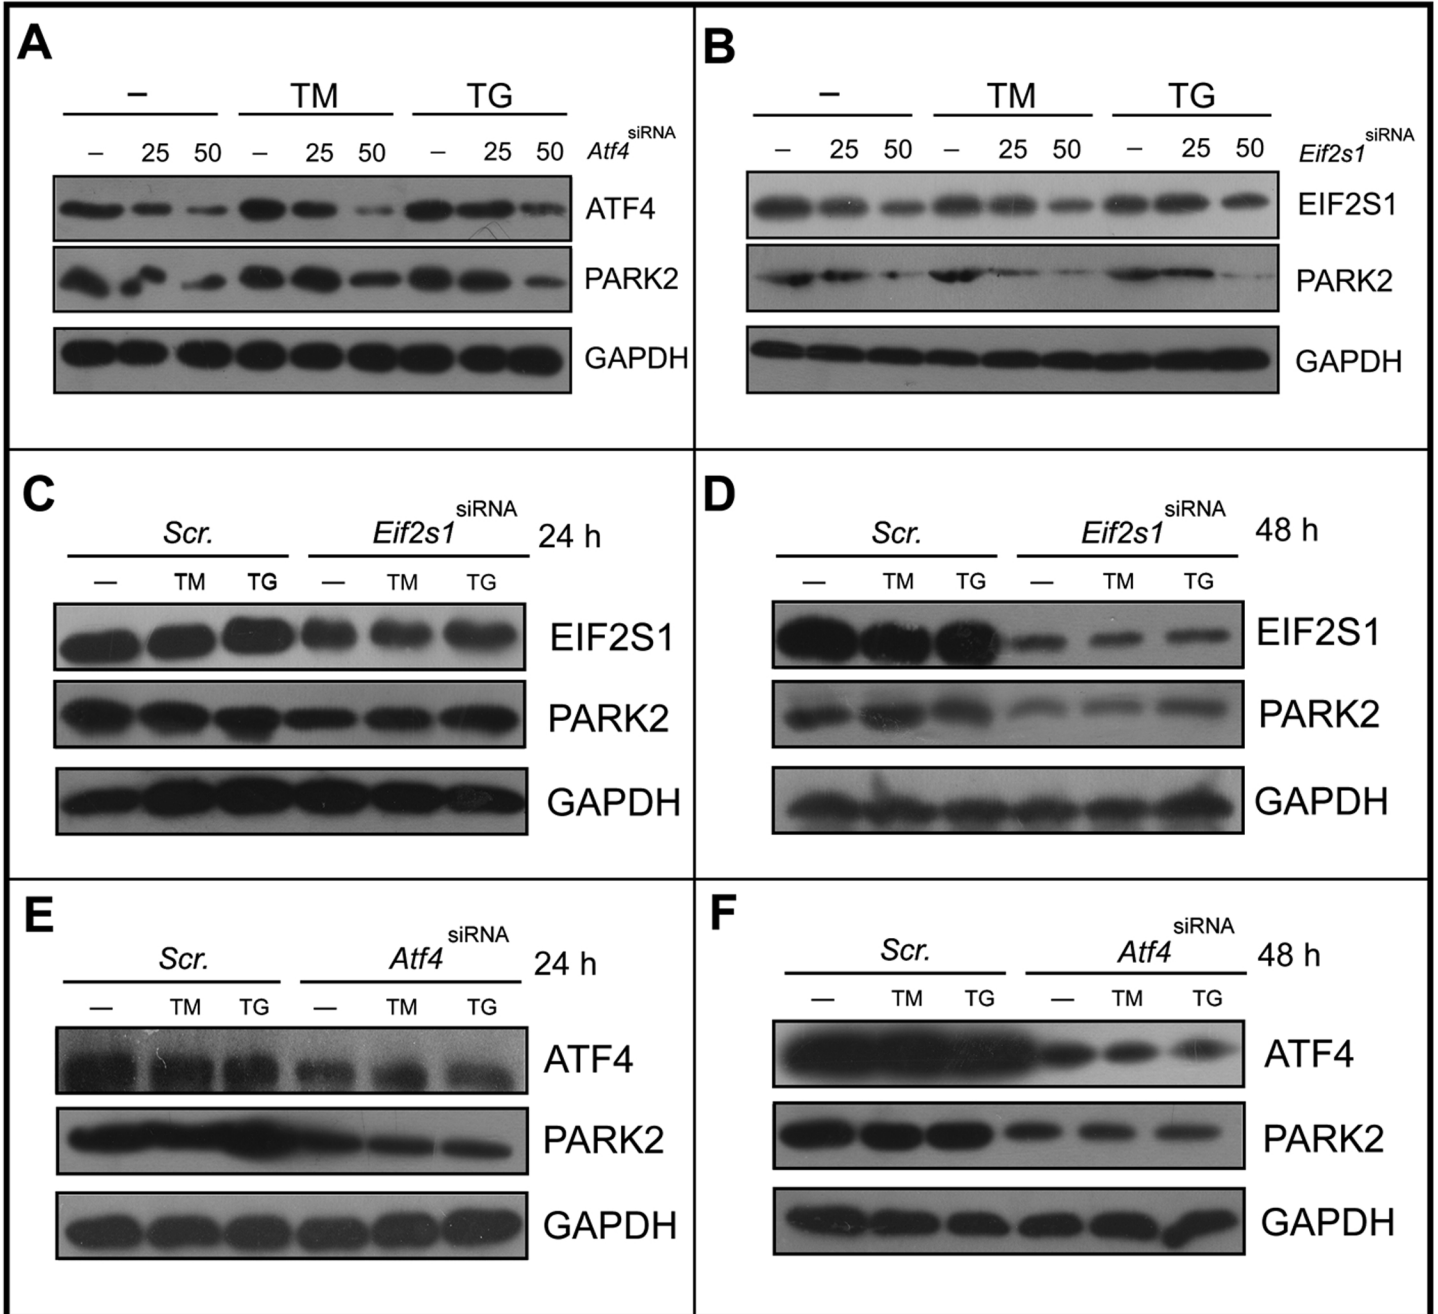

Figure S4

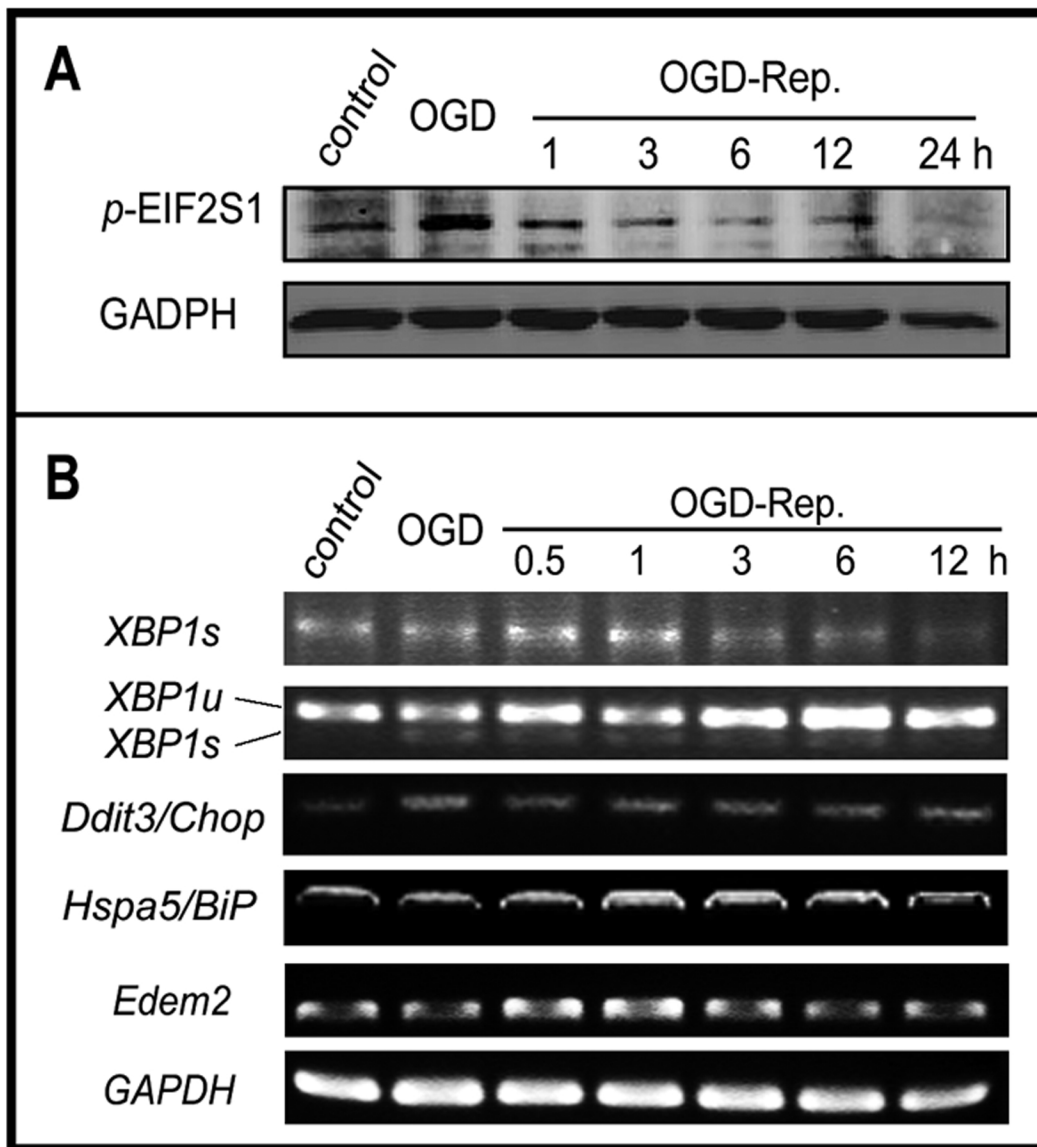

**Figure S1.** The semiquantitative analysis of western blot bands shown in Figure 3. (A) SQSTM1/GAPDH; (B) LC3-II/GAPDH; (C) TOMM20/GAPDH; (D) COX4I1/GAPDH. The data are expressed as mean  $\pm$  SD. Statistical comparisons were performed with one-way ANOVA followed by the Dunnett *t* test, \**P*<0.05, \*\**P*<0.01, \*\*\**P*<0.001 vs. the indicated group. #*P*<0.05, ##*P*<0.01 vs. OGD-Rep. alone group.

**Figure S2.** *Tomm20* and *Cox4i1* mRNA levels were unaffected by tunicamycin (TM) and thapsigargin (TG) treatment in the context of oxygen-glucose deprivation-reperfusion (OGD-Rep.). Primary cultured neurons were subjected to OGD for 2 h, and treated with 0.4 nmol/L TG or 0.2 ng/L TM at the onset of reperfusion. After 6 h of reperfusion, the levels of *Tomm20* and *Cox4i1* mRNA were determined by qRT-PCR analysis. The quantitative levels are shown in the bar chart. The data are expressed as mean  $\pm$  SD. Statistical comparisons were performed with one-way ANOVA followed by the Dunnett *t* test, relative to vehicle control group. *P* values less than 0.05 were considered statistically significant. The N.S. indicated non-significant vs. indicated group.

**Figure S3.** Knockdown of *Eif2s1* and *Atf4* reduced PARK2 expression in intact neurons. Primary cultured neuronal cells were previously treated with a lentivirus that delivered shRNA against either *Eif2s1* or *Atf4*. Then the cells were treated with 0.4 nmol/L thapsigargin (TG) or 0.2 ng/L tunicamycin (TM). (A and B) *Atf4* and *Eif2s1* were silenced by the indicated MOI of the lentivirus after 1 h of incubation, respectively. 48 h after transfection, the PARK2 levels were detected by western blot. (C to F) Cells were subjected to periods of either 24 or 48 h of transfection with *Atf4* or *Eif2s1*-silencing lentiviral vectors, respectively. The PARK2 levels were detected by western blot.

**Figure S4.** Oxygen-glucose deprivation (OGD)-induced ER stress in neuronal cells was relieved during reperfusion. Primary cultures of mouse brain cortical neurons were subjected to 2 h of OGD followed by the indicated duration of reperfusion. (A) The phosphorylated EIF2S1 level was detected by western blot. (B) The mRNA levels of spliced (*Xbp1s*), unspliced *Xbp1* (*Xbp1u*), *Ddit3/Chop*, *Hspa5/BiP* and *Edem2* were determined by PCR.
